# Supplementary material
Source: Springer Nature journal article supplement (https://www.springermedizin.de/resource/supplementary/12905_2007_119_MOESM1_ESM.pdf/9519158)
Supplement: MOESM1 [file 9519158]

Approx 40 Patients receive an invitation to participate in research interview(s)

Approx. 20 patients agree to participate by contacting the study office

Approx 10 patients are interviewed before their colposcopy appointment

Patients attend their colposcopy appointment

Approx. 20 patients are interviewed after their colposcopy appointment (10 of which have been interviewed before)

Interview transcripts are analysed and outcomes used to inform a quantitative research questionnaire.
